# Supplementary material for: Calix[4]arene amine modified silica: from fundamentals to new recyclable materials for the removal of chlorophenoxy acids from water
Source: Royal Society of Chemistry journal article supplement (doi:10.1039/c5ra02551f), 2015-01-01

The FT-IR spectrum of aminopropyle silane modified silica as well as the calix[4]arene modified silica are given in Fig. below.

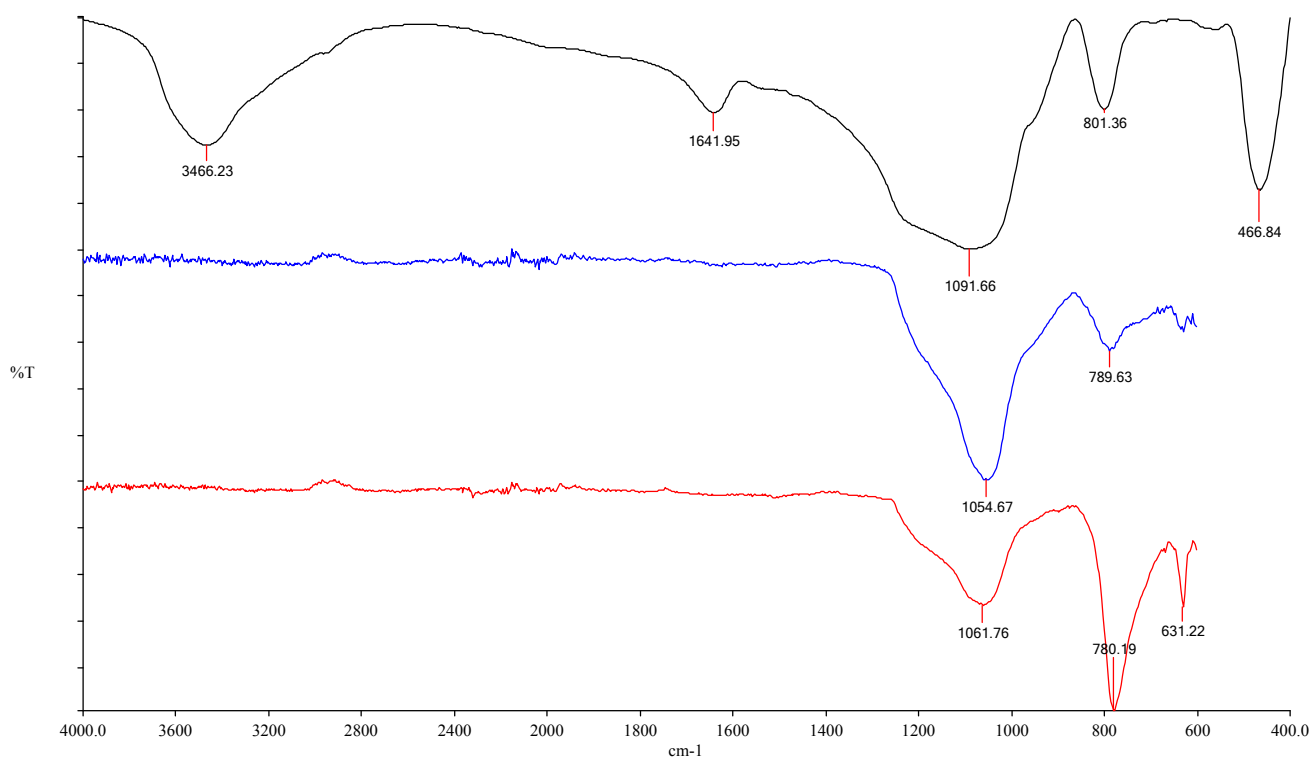

Supplement: c5ra02551f1.pdf [file c5ra02551f1.pdf]
